# Supplementary material
Source: PubMed Central journal article supplement (PMC9472567)
Supplement: mmc1.pdf [file mmc1.pdf]

# THE LANCET

## Rheumatology

### Supplementary appendix

This appendix formed part of the original submission and has been peer reviewed. We post it as supplied by the authors.

Supplement to: Figueroa-Parra G, Gilbert EL, Valenzuela-Almada MO, et al. Risk of severe COVID-19 outcomes associated with rheumatoid arthritis and phenotypic subgroups: a retrospective, comparative, multicentre cohort study. *Lancet Rheumatol* 2022; published online Sept 13. [https://doi.org/10.1016/S2665-9913\(22\)00227-2](https://doi.org/10.1016/S2665-9913(22)00227-2).

## Supplementary material

|                             |    |
|-----------------------------|----|
| Supplementary table 1.....  | 2  |
| Supplementary table 2.....  | 3  |
| Supplementary table 3.....  | 4  |
| Supplementary table 4.....  | 6  |
| Supplementary table 5.....  | 8  |
| Supplementary table 6.....  | 10 |
| Supplementary figure 1..... | 11 |

**Supplementary table 1.** Risk of severe COVID-19 and secondary outcomes among patients with rheumatoid arthritis stratified by sex.

|                                       | Female                    |                       | Male                      |                      |
|---------------------------------------|---------------------------|-----------------------|---------------------------|----------------------|
|                                       | Patients with RA<br>n=421 | Comparators<br>n=2081 | Patients with RA<br>N=161 | Comparators<br>n=794 |
| <b>Severe COVID-19, n (%)</b>         | 93 (22)                   | 248 (12)              | 33 (21)                   | 115 (14)             |
| Follow-up time, person-days           | 29,788                    | 165,358               | 11,623                    | 61,192               |
| Rate, per 1,000 days (95% CI)         | 3.12 (2.49, 3.76)         | 1.50 (1.31, 1.69)     | 2.84 (1.87, 3.81)         | 1.88 (1.54, 2.22)    |
| Unadjusted, HR (95% CI)               | 2.03 (1.65, 2.50)         | Ref.                  | 1.46 (1.07, 1.98)         | Ref.                 |
| Adjusted main model, HR (95% CI)      | 2.03 (1.62, 2.55)         | Ref.                  | 1.23 (0.88, 1.74)         | Ref.                 |
| Adjusted mediators model, HR (95% CI) | 1.92 (1.50, 2.46)         | Ref.                  | 1.12 (0.78, 1.59)         | Ref.                 |
| <b>Hospitalization, n (%)</b>         | 90 (21)                   | 241 (12)              | 31 (19)                   | 114 (14)             |
| Follow-up time, person-days           | 29,924                    | 165,942               | 11,746                    | 61,287               |
| Rate, per 1,000 days (95% CI)         | 3.01 (2.39, 3.63)         | 1.45 (1.27, 1.64)     | 2.64 (1.71, 3.57)         | 1.86 (1.52, 2.20)    |
| Unadjusted, HR (95% CI)               | 1.89 (1.55, 2.30)         | Ref.                  | 1.30 (0.95, 1.76)         | Ref.                 |
| Adjusted main model, HR (95% CI)      | 1.84 (1.49, 2.26)         | Ref.                  | 1.11 (0.79, 1.55)         | Ref.                 |
| Adjusted mediators model, HR (95% CI) | 1.81 (1.46, 2.25)         | Ref.                  | 1.01 (0.71, 1.43)         | Ref.                 |
| <b>Death, n (%)</b>                   | 18 (4)                    | 39 (2)                | 8 (5)                     | 20 (3)               |
| Follow-up time, person-days           | 36,791                    | 184,491               | 13,980                    | 70,132               |
| Rate, per 1,000 days (95% CI)         | 0.49 (0.26, 0.72)         | 0.21 (0.15, 0.29)     | 0.57 (0.18, 0.97)         | 0.29 (0.16, 0.41)    |
| Unadjusted, HR (95% CI)               | 2.48 (1.51, 4.08)         | Ref.                  | 1.99 (0.96, 4.13)         | Ref.                 |
| Adjusted main model, HR (95% CI)      | 2.38 (1.36, 4.16)         | Ref.                  | 1.04 (0.47, 2.33)         | Ref.                 |
| Adjusted mediators model, HR (95% CI) | 2.25 (1.24, 4.10)         | Ref.                  | 0.69 (0.28, 1.73)         | Ref.                 |
| <b>Mechanical ventilation, n (%)</b>  | 12 (3)                    | 37 (2)                | 5 (3)                     | 18 (2)               |
| Follow-up time, person-days           | 36,882                    | 184,116               | 14,064                    | 69,974               |
| Rate per 1,000 days, (95% CI)         | 0.33 (0.14, 0.51)         | 0.20 (0.14, 0.27)     | 0.36 (0.04, 0.67)         | 0.26 (0.14, 0.38)    |
| Unadjusted, HR (95% CI)               | 1.60 (0.90, 2.83)         | Ref.                  | 1.37 (0.58, 3.27)         | Ref.                 |
| Adjusted main model, HR (95% CI)      | 1.90 (0.95, 3.80)         | Ref.                  | 0.94 (0.37, 2.40)         | Ref.                 |
| Adjusted mediators model, HR (95% CI) | 1.70 (0.76, 3.79)         | Ref.                  | 0.50 (0.13, 1.85)         | Ref.                 |

CI: confidence interval; HR: hazard ratio.

Adjusted main model for age, sex, race, and smoking. Adjusted mediators model for age, sex, race, smoking, BMI, and Charlson comorbidity index (dichotomized as <2 or ≥ 2).

**Supplementary table 2.** Risk of severe COVID-19 and secondary outcomes among patients with rheumatoid arthritis who contracted COVID-19 before vaccines were available.

|                                       | <b>Patients with RA<br/>n=366</b> | <b>Comparators<br/>n=1807</b> |
|---------------------------------------|-----------------------------------|-------------------------------|
| <b>Severe COVID-19, n (%)</b>         | 77 (21)                           | 233 (13)                      |
| Follow-up time, person-days           | 26,290                            | 141,876                       |
| Rate, per 1,000 days (95% CI)         | 2.93 (2.27, 3.58)                 | 1.64 (1.43, 1.85)             |
| Unadjusted, HR (95% CI)               | 1.72 (1.39, 2.13)                 | Ref.                          |
| Adjusted main model, HR (95% CI)      | 1.64 (1.30, 2.07)                 | Ref.                          |
| Adjusted mediators model, HR (95% CI) | 1.49 (1.16, 1.91)                 | Ref.                          |
| <b>Hospitalization, n (%)</b>         | 73 (20)                           | 228 (13)                      |
| Follow-up time, person-days           | 26,486                            | 142,356                       |
| Rate, per 1,000 days (95% CI)         | 2.76 (2.12, 3.39)                 | 1.60 (1.39, 1.81)             |
| Unadjusted, HR (95% CI)               | 1.55 (1.26, 1.92)                 | Ref.                          |
| Adjusted main model, HR (95% CI)      | 1.49 (1.19, 1.87)                 | Ref.                          |
| Adjusted mediators model, HR (95% CI) | 1.36 (1.07, 1.73)                 | Ref.                          |
| <b>Death, n (%)</b>                   | 18 (5)                            | 42 (2)                        |
| Follow-up time, person-days           | 31,793                            | 159,512                       |
| Rate, per 1,000 days (95% CI)         | 0.57 (0.30, 0.83)                 | 0.26 (0.18, 0.34)             |
| Unadjusted, HR (95% CI)               | 2.20 (1.35, 3.60)                 | Ref.                          |
| Adjusted main model, HR (95% CI)      | 1.74 (1.01, 2.98)                 | Ref.                          |
| Adjusted mediators model, HR (95% CI) | 1.53 (0.85, 2.76)                 | Ref.                          |
| <b>Mechanical ventilation, n (%)</b>  | 13 (4)                            | 39 (2)                        |
| Follow-up time, person-days           | 31,849                            | 159,346                       |
| Rate per 1,000 days, (95% CI)         | 0.41 (0.19, 0.63)                 | 0.25 (0.17, 0.32)             |
| Unadjusted, HR (95% CI)               | 1.64 (0.95, 2.82)                 | Ref.                          |
| Adjusted main model, HR (95% CI)      | 1.75 (0.93, 3.28)                 | Ref.                          |
| Adjusted mediators model, HR (95% CI) | 1.44 (0.74, 2.80)                 | Ref.                          |

CI: confidence interval; HR: hazard ratio.

Adjusted main model for age, sex, race, and smoking. Adjusted mediators model for age, sex, race, smoking, BMI, and Charlson comorbidity index (dichotomized as <2 or ≥ 2).

**Supplementary table 3.** Risk of severe COVID-19 and secondary outcomes by rheumatoid arthritis (RA) phenotype in comparison to their matched general population.

|                                      | <b>RA-ILD<br/>n=50</b> | <b>Comparators<br/>n=249</b> | <b>Seropositive<br/>n=388</b> | <b>Comparators<br/>n=1915</b> | <b>Erosive disease<br/>n=159</b> | <b>Comparators<br/>n=790</b> |
|--------------------------------------|------------------------|------------------------------|-------------------------------|-------------------------------|----------------------------------|------------------------------|
| <b>Severe COVID-19, n (%)</b>        | 25 (50)                | 46 (18)                      | 84 (22)                       | 224 (12)                      | 41 (26)                          | 120 (15)                     |
| Follow-up time, person-days          | 2,285                  | 18,292                       | 27,509                        | 152,483                       | 10,687                           | 60,571                       |
| Rate, per 1,000 days (95% CI)        | 10.90<br>(6.70, 15.20) | 2.50<br>(1.80, 3.20)         | 3.10<br>(2.40, 3.70)          | 1.50<br>(1.30, 1.70)          | 3.80<br>(2.70, 5.00)             | 2.00<br>(1.60, 2.30)         |
| Unadjusted HR (95% CI)               | 2.89<br>(2.03, 4.11)   | Ref.                         | 2.00<br>(1.62, 2.47)          | Ref.                          | 2.05<br>(1.54, 2.73)             | Ref.                         |
| Adjusted main model HR (95% CI)      | 2.50<br>(1.66, 3.77)   | Ref.                         | 1.97<br>(1.58, 2.46)          | Ref.                          | 1.93<br>(1.41, 2.63)             | Ref.                         |
| Adjusted mediators model HR (95% CI) | 2.52<br>(1.52, 4.17)   | Ref.                         | 1.89<br>(1.49, 2.40)          | Ref.                          | 2.03<br>(1.46, 2.84)             | Ref.                         |
| <b>Hospitalization, n (%)</b>        | 24 (48)                | 45 (18)                      | 82 (21)                       | 221 (12)                      | 40 (25)                          | 115 (15)                     |
| Follow-up time, person-days          | 2,368                  | 18,388                       | 27,656                        | 152,739                       | 10,770                           | 60,908                       |
| Rate, per 1,000 days, (95% CI)       | 10.10<br>(6.10, 14.20) | 2.40<br>(1.70, 3.20)         | 3.00<br>(2.30, 3.60)          | 1.40<br>(1.30, 1.60)          | 3.70<br>(2.60, 4.90)             | 1.90<br>(1.50, 2.20)         |
| Unadjusted HR (95% CI)               | 2.79<br>(1.97, 3.95)   | Ref.                         | 1.85<br>(1.52, 2.25)          | Ref.                          | 1.86<br>(1.41, 2.44)             | Ref.                         |
| Adjusted main model HR (95% CI)      | 2.41<br>(1.60, 3.62)   | Ref.                         | 1.84<br>(1.49, 2.26)          | Ref.                          | 1.77<br>(1.32, 2.37)             | Ref.                         |
| Adjusted mediators model HR (95% CI) | 2.45<br>(1.49, 4.02)   | Ref.                         | 1.81<br>(1.46, 2.25)          | Ref.                          | 1.89<br>(1.40, 2.55)             | Ref.                         |
| <b>Death, n (%)</b>                  | 9 (18)                 | 10 (4)                       | 15 (4)                        | 35 (2)                        | 8 (5)                            | 21 (3)                       |
| Follow-up time, person-days          | 3,877                  | 21,696                       | 33,916                        | 169,998                       | 13,747                           | 69,694                       |
| Rate, per 1,000 days, (95% CI)       | 2.30<br>(0.80, 3.80)   | 0.50<br>(0.20, 0.70)         | 0.40<br>(0.20, 0.70)          | 0.20<br>(0.10, 0.30)          | 0.60<br>(0.20, 1.00)             | 0.30<br>(0.20, 0.40)         |
| Unadjusted HR (95% CI)               | 6.34<br>(2.72, 14.78)  | Ref.                         | 2.34<br>(1.37, 4.01)          | Ref.                          | 2.20<br>(1.06, 4.56)             | Ref.                         |
| Adjusted main model HR (95% CI)      | 5.83<br>(2.16, 15.70)  | Ref.                         | 1.91<br>(1.07, 3.40)          | Ref.                          | 2.16<br>(0.90, 5.16)             | Ref.                         |
| Adjusted mediators model HR (95% CI) | 5.63<br>(1.82, 17.45)  | Ref.                         | 1.22<br>(0.61, 2.44)          | Ref.                          | 2.44<br>(0.77, 7.71)             | Ref.                         |
| <b>Mechanical ventilation, n (%)</b> | 5 (10)                 | 6 (2)                        | 12 (3)                        | 31 (2)                        | 5 (3)                            | 14 (2)                       |
| Follow-up time, person-days          | 4,077                  | 21,908                       | 33,920                        | 169,709                       | 13,877                           | 69,926                       |
| Rate per 1,000 days, (95% CI)        | 1.20<br>(0.20, 2.30)   | 0.30<br>(0.10, 0.50)         | 0.40<br>(0.20, 0.60)          | 0.20<br>(0.10, 0.20)          | 0.40<br>(0.00, 0.70)             | 0.20<br>(0.10, 0.30)         |
| Unadjusted HR (95% CI)               | 4.17<br>(1.54, 11.27)  | Ref.                         | 1.90<br>(1.07, 3.39)          | Ref.                          | 1.76<br>(0.71, 4.38)             | Ref.                         |
| Adjusted main model HR (95% CI)      | 2.28<br>(0.48, 10.82)  | Ref.                         | 1.85<br>(0.95, 3.59)          | Ref.                          | 1.28<br>(0.48, 3.42)             | Ref.                         |

|                                         |                      |      |                      |      |                      |      |
|-----------------------------------------|----------------------|------|----------------------|------|----------------------|------|
| Adjusted mediators model HR<br>(95% CI) | 2.21<br>(0.52, 9.47) | Ref. | 1.68<br>(0.82, 3.46) | Ref. | 1.02<br>(0.40, 2.61) | Ref. |
|-----------------------------------------|----------------------|------|----------------------|------|----------------------|------|

CI: confidence interval; HR: hazard ratio.

Adjusted main model for age, sex, race, and smoking. Adjusted mediators model for age, sex, race, smoking, BMI, and Charlson comorbidity index (dichotomized as  $<2$  or  $\geq 2$ ).

\*Positivity either to rheumatoid factor or anti-CCP.

**Supplementary table 4:** Risk of severe COVID-19 among patients with mutually exclusive RA phenotypes.

| <b>ILD+/Seropositive/Erosion+</b> | <b>Patients with RA<br/>N=13</b>  | <b>Comparators<br/>N=65</b>  |
|-----------------------------------|-----------------------------------|------------------------------|
| Event, n (%)                      | 9 (69)                            | 17 (26)                      |
| Follow-up time, person-days       | 373                               | 4,353                        |
| Rate, per 1,000 days (95% CI)     | 24.13 (8.36, 39.89)               | 3.91 (2.05, 5.76)            |
| RD, per 1,000 days (95% CI)       | 20.22 (4.35, 36.10)               | -                            |
| Unadjusted model, HR (95% CI)     | 3.12 (1.84, 5.28)                 | Ref.                         |
| Adjusted main model, HR (95% CI)  | 2.69 (1.20, 6.02)                 | Ref.                         |
| <b>ILD+/Seropositive/Erosion-</b> | <b>Patients with RA<br/>N=29</b>  | <b>Comparators<br/>N=144</b> |
| Event, n (%)                      | 12 (41)                           | 17 (12)                      |
| Follow-up time, person-days       | 1,550                             | 11,414                       |
| Rate, per 1,000 days (95% CI)     | 7.74 (3.36, 12.12)                | 1.49 (0.78, 2.20)            |
| RD, per 1,000 days (95% CI)       | 6.25 (1.82, 10.69)                | -                            |
| Unadjusted model, HR (95% CI)     | 3.69 (2.11, 6.44)                 | Ref.                         |
| Adjusted main model, HR (95% CI)  | 4.95 (2.49, 9.82)                 | Ref.                         |
| <b>ILD+/Seronegative/Erosion+</b> | <b>Patients with RA<br/>N=1</b>   | <b>Comparators<br/>N=5</b>   |
| <i>Not Performed</i>              |                                   |                              |
| <b>ILD+/Seronegative/Erosion-</b> | <b>Patients with RA<br/>N=7</b>   | <b>Comparators<br/>N=35</b>  |
| Event, n (%)                      | 3 (43)                            | 9 (26)                       |
| Follow-up time, person-days       | 362                               | 2,343                        |
| Rate, per 1,000 days (95% CI)     | 8.29 (0.00, 17.67)                | 3.84 (1.33, 6.35)            |
| RD, per 1,000 days (95% CI)       | 4.45 (-5.26, 14.15)               | -                            |
| Unadjusted model, HR (95% CI)     | 1.43 (0.51, 4.02)                 | Ref.                         |
| Adjusted main model, HR (95% CI)  | 0.71 (0.12, 4.05)                 | Ref.                         |
| <b>ILD-/Seropositive/Erosion+</b> | <b>Patients with RA<br/>N=106</b> | <b>Comparators<br/>N=526</b> |
| Event, n (%)                      | 21 (20)                           | 82 (16)                      |
| Follow-up time, person-days       | 7,682                             | 40,135                       |
| Rate, per 1,000 days (95% CI)     | 2.73 (1.56, 3.90)                 | 2.04 (1.60, 2.49)            |
| RD, per 1,000 days (95% CI)       | 0.69 (-0.56, 1.94)                | -                            |
| Unadjusted model, HR (95% CI)     | 1.48 (0.99, 2.22)                 | Ref.                         |

|                                   |                                   |                                |
|-----------------------------------|-----------------------------------|--------------------------------|
| Adjusted main model, HR (95% CI)  | 1.52 (0.98, 2.36)                 | Ref.                           |
| <b>ILD-/Seropositive/Erosion-</b> | <b>Patients with RA<br/>N=240</b> | <b>Comparators<br/>N=1,180</b> |
| Event, n (%)                      | 42 (18)                           | 108 (9)                        |
| Follow-up time, person-days       | 17,904                            | 96,581                         |
| Rate, per 1,000 days (95% CI)     | 2.35 (1.64, 3.06)                 | 1.12 (0.91, 1.33)              |
| RD, per 1,000 days (95% CI)       | 1.23 (0.49, 1.97)                 | -                              |
| Unadjusted model, HR (95% CI)     | 1.92 (1.40, 2.65)                 | Ref.                           |
| Adjusted main model, HR (95% CI)  | 1.91 (1.35, 2.69)                 | Ref.                           |
| <b>ILD-/Seronegative/Erosion+</b> | <b>Patients with RA<br/>N=36</b>  | <b>Comparators<br/>N=179</b>   |
| Event, n (%)                      | 8 (22)                            | 12 (7)                         |
| Follow-up time, person-days       | 2,542                             | 15,083                         |
| Rate, per 1,000 days (95% CI)     | 3.15 (0.97, 5.33)                 | 0.80 (0.35, 1.25)              |
| RD, per 1,000 days (95% CI)       | 2.35 (0.12, 4.58)                 | -                              |
| Unadjusted model, HR (95% CI)     | 3.43 (1.56, 7.54)                 | Ref.                           |
| Adjusted main model, HR (95% CI)  | 4.45 (1.81, 10.96)                | Ref.                           |
| <b>ILD-/Seronegative/Erosion-</b> | <b>Patients with RA<br/>N=136</b> | <b>Comparators<br/>N=672</b>   |
| Event, n (%)                      | 23 (17)                           | 85 (13)                        |
| Follow-up time, person-days       | 10,304                            | 52,918                         |
| Rate, per 1,000 days (95% CI)     | 2.23 (1.32, 3.14)                 | 1.61 (1.26, 1.95)              |
| RD, per 1,000 days (95% CI)       | 0.63 (-0.35, 1.60)                | -                              |
| Unadjusted model, HR (95% CI)     | 1.40 (0.94, 2.08)                 | Ref.                           |
| Adjusted main model, HR (95% CI)  | 1.23 (0.80, 1.88)                 | Ref.                           |

CI: confidence interval; HR: hazard ratio; RD: rate difference.

Adjusted main model for age, sex, race, and smoking.

Seropositivity either to rheumatoid factor or anti-CCP.



**Supplementary Table 5.** The association of rheumatoid arthritis (RA) phenotypes with the risk of severe COVID-19 and other outcomes.

|                                      | Patients with rheumatoid arthritis |                      |                      |                      |                      |                      |
|--------------------------------------|------------------------------------|----------------------|----------------------|----------------------|----------------------|----------------------|
|                                      | ILD                                |                      | Serostatus*          |                      | Bone erosions        |                      |
|                                      | Positive<br>n=50                   | Negative<br>n=532    | Positive<br>n=388    | Negative<br>n=180    | Positive<br>n=159    | Negative<br>n=423    |
| <b>Severe COVID-19, n (%)</b>        | 25 (50)                            | 101 (19)             | 84 (22)              | 35 (19)              | 41 (26)              | 85 (20)              |
| Follow-up time, person-days          | 2,285                              | 39,126               | 27,509               | 13,208               | 10,687               | 30,724               |
| Rate, per 1,000 days (95% CI)        | 10.90<br>(6.70, 15.20)             | 2.60<br>(2.10, 3.10) | 3.10<br>(2.40, 3.70) | 2.60<br>(1.80, 3.50) | 3.80<br>(2.70, 5.00) | 2.80<br>(2.20, 3.40) |
| Unadjusted HR (95% CI)               | 3.43<br>(2.19, 5.36)               | Ref.                 | 1.21<br>(0.74, 2.00) | Ref.                 | 1.37<br>(0.95, 1.97) | Ref.                 |
| Adjusted model 1 HR (95% CI)         | 2.61<br>(1.52, 4.47)               | Ref.                 | 1.21<br>(0.71, 2.05) | Ref.                 | 1.16<br>(0.81, 1.66) | Ref.                 |
| Adjusted model 2 HR (95% CI)         | 2.45<br>(1.55, 3.87)               | Ref.                 | 1.11<br>(0.68, 1.81) | Ref.                 | 1.07<br>(0.76, 1.50) | Ref.                 |
| <b>Hospitalization, n (%)</b>        | 24 (48)                            | 97 (18)              | 82 (21)              | 33 (18)              | 40 (25)              | 81 (19)              |
| Follow-up time, person-days          | 2,368                              | 39,302               | 27,656               | 13,294               | 10,770               | 30,900               |
| Rate, per 1,000 days, (95% CI)       | 10.10<br>(6.10, 14.20)             | 2.50<br>(2.00, 3.00) | 3.00<br>(2.30, 3.60) | 2.50<br>(1.60, 3.30) | 3.70<br>(2.60, 4.90) | 2.60<br>(2.10, 3.20) |
| Unadjusted HR (95% CI)               | 3.01<br>(1.89, 4.79)               | Ref.                 | 1.18<br>(0.73, 1.91) | Ref.                 | 1.34<br>(0.94, 1.92) | Ref.                 |
| Adjusted model 1 HR (95% CI)         | 5.75<br>(0.69, 47.65)              | Ref.                 | 1.17<br>(0.70, 1.96) | Ref.                 | 1.14<br>(0.80, 1.63) | Ref.                 |
| Adjusted model 2 HR (95% CI)         | 2.15<br>(1.29, 3.60)               | Ref.                 | 1.07<br>(0.67, 1.72) | Ref.                 | 1.05<br>(0.75, 1.49) | Ref.                 |
| <b>Death, n (%)</b>                  | 9 (18)                             | 17 (3)               | 15 (4)               | 10 (6)               | 8 (5)                | 18 (4)               |
| Follow-up time, person-days          | 3,877                              | 46,894               | 33,916               | 15,621               | 13,747               | 37,024               |
| Rate, per 1,000 days, (95% CI)       | 2.30<br>(0.80, 3.80)               | 0.40<br>(0.20, 0.50) | 0.40<br>(0.20, 0.70) | 0.60<br>(0.20, 1.00) | 0.60<br>(0.20, 1.00) | 0.50<br>(0.30, 0.70) |
| Unadjusted HR (95% CI)               | 8.81<br>(3.09, 25.09)              | Ref.                 | 0.62<br>(0.21, 1.82) | Ref.                 | 1.20<br>(0.52, 2.75) | Ref.                 |
| Adjusted model 1 HR (95% CI)         | 7.71<br>(2.44, 24.37)              | Ref.                 | 0.64<br>(0.21, 1.82) | Ref.                 | 0.94<br>(0.40, 2.23) | Ref.                 |
| Adjusted model 2 HR (95% CI)         | 7.16<br>(2.32, 22.07)              | Ref.                 | 0.62<br>(0.20, 1.99) | Ref.                 | 0.88<br>(0.37, 2.09) | Ref.                 |
| <b>Mechanical ventilation, n (%)</b> | 5 (10)                             | 12 (2)               | 12 (3)               | 5 (3)                | 5 (3)                | 12 (3)               |
| Follow-up time, person-days          | 4,077                              | 46,869               | 33,920               | 15,766               | 13,877               | 37,069               |
| Rate per 1,000 days, (95% CI)        | 1.20<br>(0.20, 2.30)               | 0.30<br>(0.10, 0.40) | 0.40<br>(0.20, 0.60) | 0.30<br>(0.00, 0.60) | 0.40<br>(0.00, 0.70) | 0.30<br>(0.10, 0.50) |
| Unadjusted HR (95% CI)               | 4.70                               | Ref.                 | 1.19                 | Ref.                 | 1.12                 | Ref.                 |

|                              |                       |      |                      |      |                      |      |
|------------------------------|-----------------------|------|----------------------|------|----------------------|------|
|                              | (1.49, 14.80)         |      | (0.36, 3.87)         |      | (0.39, 3.17)         |      |
| Adjusted model 1 HR (95% CI) | 2.40<br>(0.76, 7.63)  | Ref. | 1.06<br>(0.24, 4.73) | Ref. | 0.79<br>(0.26, 2.40) | Ref. |
| Adjusted model 2 HR (95% CI) | 3.01<br>(0.90, 10.08) | Ref. | 1.05<br>(0.32, 3.43) | Ref. | 0.77<br>(0.27, 2.19) | Ref. |

CI: confidence interval; HR: hazard ratio.

Model 1 adjusted for age, sex, race, and wave of infection. Model 2 adjusted for age, sex, b/tsDMARD (yes/no), and wave of infection.

\*Positivity either to rheumatoid factor or anti-CCP.

**Supplementary table 6.** Risk of severe COVID-19 and secondary outcomes among patients with rheumatoid arthritis stratified by rheumatoid factor and anti-CCP status.

|                                       | Rheumatoid factor |                       | Anti-CCP          |                       |
|---------------------------------------|-------------------|-----------------------|-------------------|-----------------------|
|                                       | Positive<br>n=302 | Comparators<br>n=1490 | Positive<br>n=312 | Comparators<br>n=1539 |
| <b>Severe COVID-19, n (%)</b>         | 70 (23)           | 188 (13)              | 61 (20)           | 168 (11)              |
| Follow-up time, person-days           | 21,026            | 117,463               | 22,684            | 123,555               |
| Rate, per 1,000 days (95% CI)         | 3.30 (2.50, 4.10) | 1.60 (1.37, 1.83)     | 2.70 (2.00, 3.40) | 1.36 (1.15, 1.57)     |
| Unadjusted, HR (95% CI)               | 1.99 (1.58, 2.50) | Ref.                  | 1.97 (1.53, 2.53) | Ref.                  |
| Adjusted main model, HR (95% CI)      | 2.03 (1.59, 2.59) | Ref.                  | 1.94 (1.49, 2.54) | Ref.                  |
| Adjusted mediators model, HR (95% CI) | 1.96 (1.52, 2.55) | Ref.                  | 1.81 (1.36, 2.42) | Ref.                  |
| <b>Hospitalization, n (%)</b>         | 68 (23)           | 185 (12)              | 60 (19)           | 167 (11)              |
| Follow-up time, person-days           | 21,158            | 117,713               | 22,748            | 123,690               |
| Rate, per 1,000 days (95% CI)         | 3.20 (2.50, 4.00) | 1.57 (1.35, 1.80)     | 2.60 (2.00, 3.30) | 1.35 (1.15, 1.55)     |
| Unadjusted, HR (95% CI)               | 1.82 (1.46, 2.26) | Ref.                  | 1.82 (1.44, 2.29) | Ref.                  |
| Adjusted main model, HR (95% CI)      | 1.86 (1.48, 2.34) | Ref.                  | 1.82 (1.42, 2.34) | Ref.                  |
| Adjusted mediators model, HR (95% CI) | 1.88 (1.48, 2.38) | Ref.                  | 1.76 (1.34, 2.30) | Ref.                  |
| <b>Death, n (%)</b>                   | 13 (4)            | 28 (2)                | 12 (4)            | 24 (2)                |
| Follow-up time, person-days           | 26,278            | 132,180               | 27,296            | 136,844               |
| Rate, per 1,000 days (95% CI)         | 0.50 (0.20, 0.80) | 0.21 (0.13, 0.29)     | 0.40 (0.20, 0.70) | 0.18 (0.11, 0.25)     |
| Unadjusted, HR (95% CI)               | 2.54 (1.42, 4.54) | Ref.                  | 2.67 (1.45, 4.91) | Ref.                  |
| Adjusted main model, HR (95% CI)      | 2.01 (1.03, 3.91) | Ref.                  | 2.16 (1.08, 4.33) | Ref.                  |
| Adjusted mediators model, HR (95% CI) | 1.22 (0.59, 2.52) | Ref.                  | 1.48 (0.63, 3.46) | Ref.                  |
| <b>Mechanical ventilation, n (%)</b>  | 11 (4)            | 27 (2)                | 10 (3)            | 26 (2)                |
| Follow-up time, person-days           | 26,266            | 131,815               | 27,253            | 136,310               |
| Rate per 1,000 days, (95% CI)         | 0.40 (0.20, 0.70) | 0.21 (0.13, 0.28)     | 0.40 (0.10, 0.60) | 0.19 (0.12, 0.26)     |
| Unadjusted, HR (95% CI)               | 2.00 (1.09, 3.66) | Ref.                  | 1.90 (1.01, 3.56) | Ref.                  |
| Adjusted main model, HR (95% CI)      | 1.99 (0.98, 4.03) | Ref.                  | 1.81 (0.82, 3.99) | Ref.                  |
| Adjusted mediators model, HR (95% CI) | 1.86 (0.84, 4.11) | Ref.                  | 2.22 (0.92, 5.32) | Ref.                  |

CI: confidence interval; HR: hazard ratio.

Adjusted main model for age, race, and smoking. Adjusted mediators model for age, race, smoking, BMI, and Charlson comorbidity index (dichotomized as <2 or ≥ 2).

**Supplementary figure 1.** Rate difference of RA phenotypic subgroups vs matched comparators for severe outcomes.

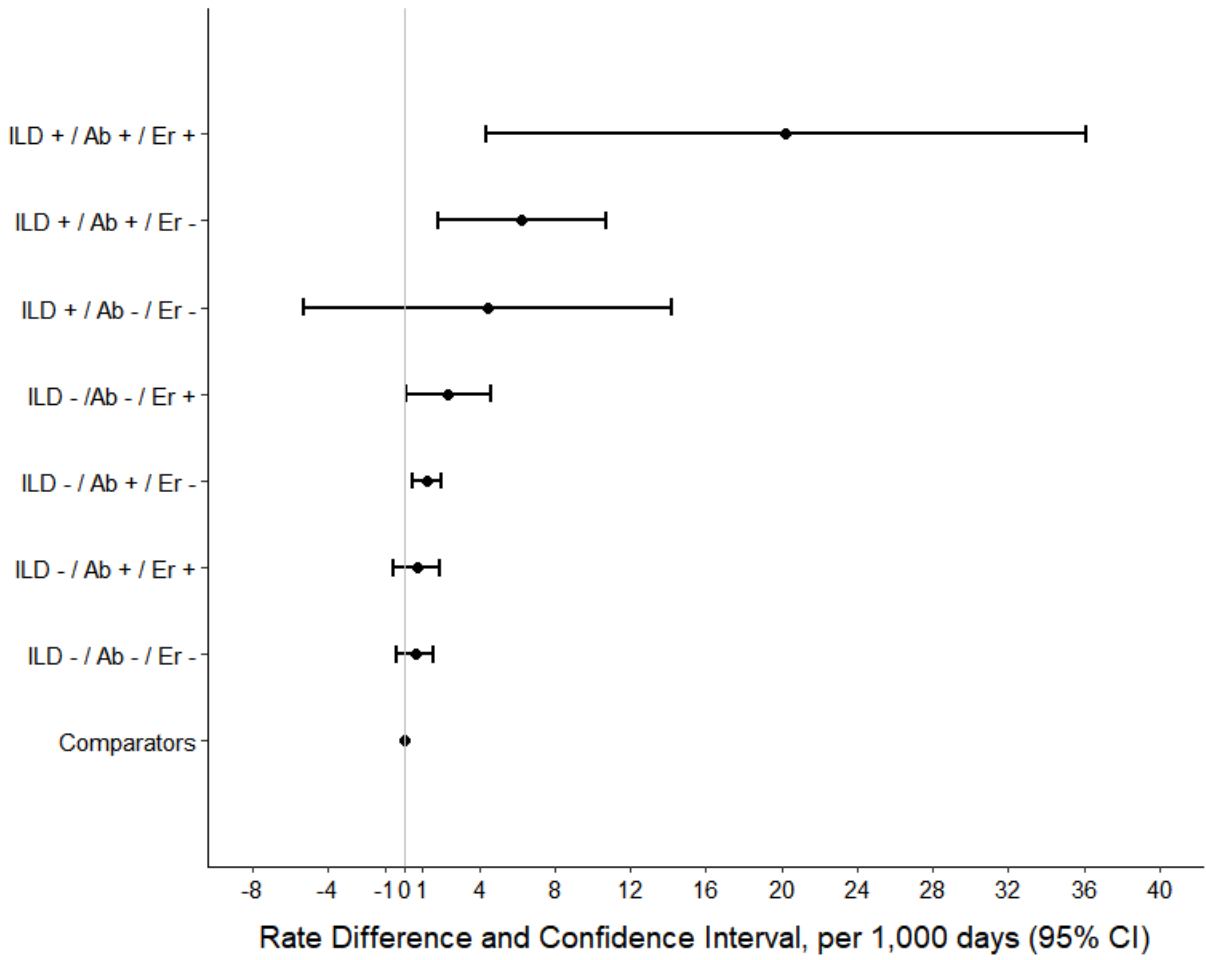

Ab: Serostatus; Er: Bone erosions; ILD: Interstitial Lung Disease.
